# Supplementary material for: A degradation fragment of type X collagen is a real-time marker for bone growth velocity
Source: PubMed Central journal article supplement (PMC6516194; doi:10.1126/scitranslmed.aan4669), 2017-12-06
Supplement: STM-09-eaan4669-s1.pdf [file STM-09-eaan4669-s1.pdf]

Supplementary Materials for  
**A degradation fragment of type X collagen is a real-time marker for  
bone growth velocity**

Ryan F. Coghlan, Jon A. Oberdorf, Susan Sienko, Michael D. Aiona, Bruce A. Boston,  
Kara J. Connelly, Chelsea Bahney, Jeremie LaRouche, Sarah M. Almubarak,  
Daniel T. Coleman, Irute Girkontaite, Klaus von der Mark, Gregory P. Lunstrum,  
William A. Horton\*

\*Corresponding author. Email: wah@shcc.org

Published 6 December 2017, *Sci. Transl. Med.* **9**, eaan4669 (2017)  
DOI: 10.1126/scitranslmed.aan4669

**This PDF file includes:**

Materials and Methods

Fig. S1. Fully tryptic fragments generated in mass spectrometry analysis.

Fig. S2. Dissociation of mouse rNC1 into dimers and monomers.

Fig. S3. Lower limit of quantitation.

Fig. S4. CXM stability testing.

Fig. S5. Relationship of stadiometer-based height velocities to CXM.

Fig. S6. Relationship between serum, plasma, and DBS concentrations.

Fig. S7. Half-life of CXM.

Table S1. Technical characterization of CXM assay.

Table S2. Diurnal variation data.

Table S3. Blood sample data.

## **Materials and Methods**

### *LLOQ calculations, experimental testing*

Using calculations published by Armbruster et al (42), our lower limit of blank (LOB) for the CXM assay was determined to be 0.0722 ABS units at 450 nm. Lower limit of quantitation (LLOQ) testing (Fig. S3) was performed by diluting human rNC1 calibrator to concentrations of 7.5, 6.25, 4.5, and 3.13 pg/ml and running 16 separate replicates in a CXM ELISA. From this data we were able to calculate the theoretical limit of detection (LOD) as 0.0837 ABS units at 450 nm and the LLOQ as 0.1139 ABS units at 450 nm. This LLOQ value equates to 5.4 pg/ml.

### *CXM stability testing*

For freeze/thaw analysis five separate serum samples from children in our study 1.6-12 years of age were thawed and assayed by CXM ELISA for an initial determination. Samples were then re-frozen at -20°C for 18 hours, thawed, and sampled again. This process was repeated for 5 freeze-thaw cycles. CXM concentrations for each subsequent freeze-thaw step were compared to the initial value and percent recovered plotted. (Fig. S4A).

For temperature stability analysis cord serum, serum, and plasma samples were thawed, aliquoted, and incubated at 4°C, 25°C, 37°C, or 50°C conditions for 18 hours. Samples were then assayed by CXM ELISA and the result for each temperature treatment was compared to their respective 4°C measurement (Fig. S4B).

DBS stability analysis utilized Whatman 903™ protein saver cards spotted with umbilical cord blood. Dried cards were placed in re-sealable bags with desiccant and stored for 8 days at -20°C, 4°C, 23°C (on bench), 23°C in envelope (on bench), 23°C (in variable sunlight, on windowsill),

at 37°C, at 37°C in a cell culture incubator (card placed in a petri dish instead of the re-sealable bag, no desiccant, in >95% humidity controlled, 5% CO<sub>2</sub> incubator), and at 55°C. After incubation 3.1mm punches were eluted and assayed by CXM ELISA and the resulting concentrations were compared as a percentage of the -20°C measurement (Fig. S4C).

#### *Manufacture of SOMA1-Capture ELISA Plates*

The SOMA1 reagent described proved effective at capturing both human and mouse markers, so the procedure below was used to generate plates for both assays.

**STREPTAVIDIN:** 100 µl/well of streptavidin (4 µg/ml in Coating Buffer) was added to each well of a 96 well 'High Bind' ELISA plate and incubated overnight at 4°C. Wash the next day with PBS (3 X 300 µl/well).

**BLOCK 1:** Plates were blocked for 1 hour by adding 300 µl/well of Blocking Buffer at RT and washed with PBS (3 X 300 µl/well).

**SOMA1:** 100 µl/well of biotinylated SOMA1 (3 pmoles/ml in SOMAmer Plating Buffer) was added to plates and incubated overnight at 4°C. Wash the next day with PBS (5 X 300 µl/well).

**BLOCK 2:** Plates were blocked for 10 minutes with 300 µl/well of Superblock at RT, emptied, and patted dry on paper towels to remove excess Superblock.

**DRY:** The plates were then dried in a desiccator at RT (until desiccator environment reached less than 10% humidity).

**STORAGE:** Plates were individually sealed in foil bags with desiccant pouches and stored at 4°C until use.

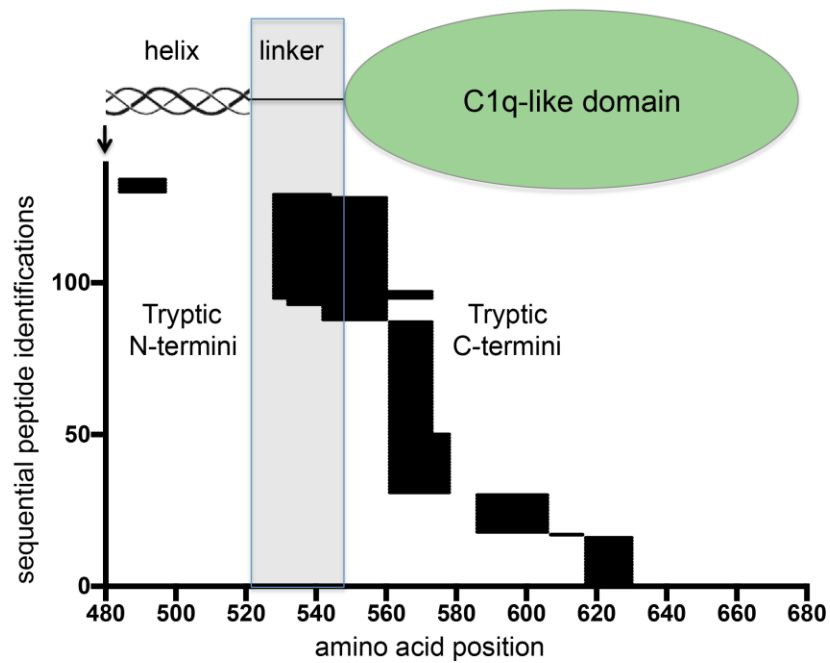

**Fig. S1. Fully tryptic fragments generated in mass spectrometry analysis.** Tryptic high-confidence peptide sequences are represented by stacked horizontal lines corresponding to their placement within the CXM marker. Proposed collagenase cut site (↓) corresponds to beginning of X-axis. Functional domains are diagrammed above graph with the linker region defined by a shaded box.

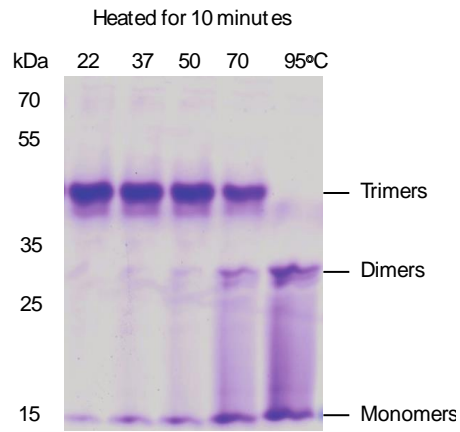

**Fig. S2. Dissociation of mouse rNC1 into dimers and monomers.** 3 $\mu$ g/lane of the recombinant NC1 region of mouse type X collagen was analyzed on SDS-PAGE after incubation in gel loading buffer for 10 minutes at the indicated temperatures. Protein was visualized with Coomassie stain.

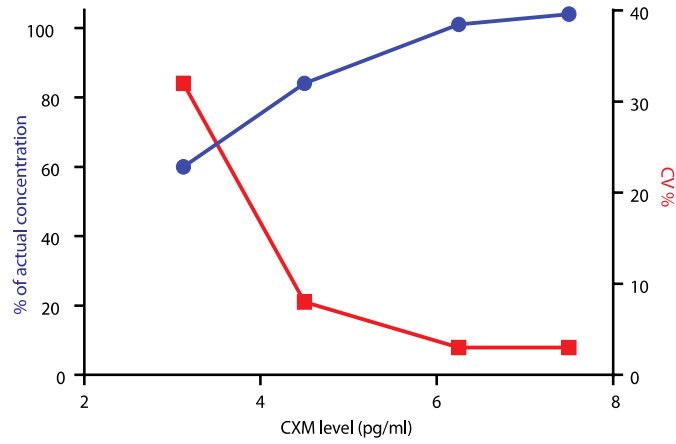

**Fig. S3. Lower limit of quantitation.** LLOQ testing was performed by diluting rNC1 calibrator to extremely low levels and calculating concentration CV% for each level (red). Concentrations determined for each sample were plotted as a percentage of their actual concentration (blue). The calculated LLOQ of 5.4 pg/ml is supported by this experimental data.

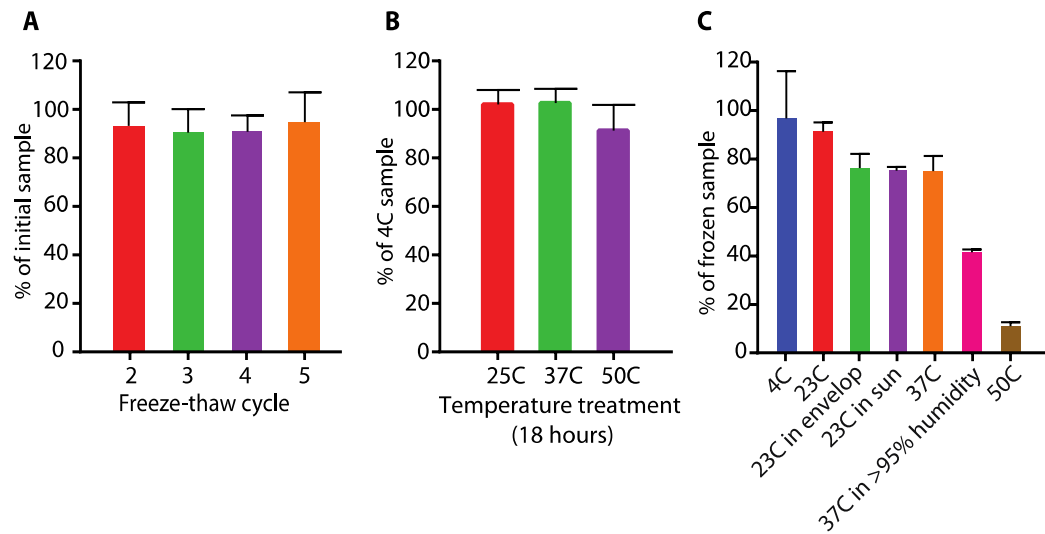

**Fig. S4. CXM stability testing.** CXM stability data showing variances from repeated freeze-thaw cycles, temperature stresses, and storage conditions. SD bars shown. (A) Percentage of recovery for serum samples cycled through 5 freeze/thaws with first freeze/thaw sample used as standard for comparison (n=5). (B) Cord serum, child serum, and child plasma temperature treatment concentrations compared as a percentage of their individual 4°C value but plotted together for statistical analysis (n=3). (C) DBS stability conditions are compared as a percentage of -20°C DBS sample (n=4, 8 day treatment).

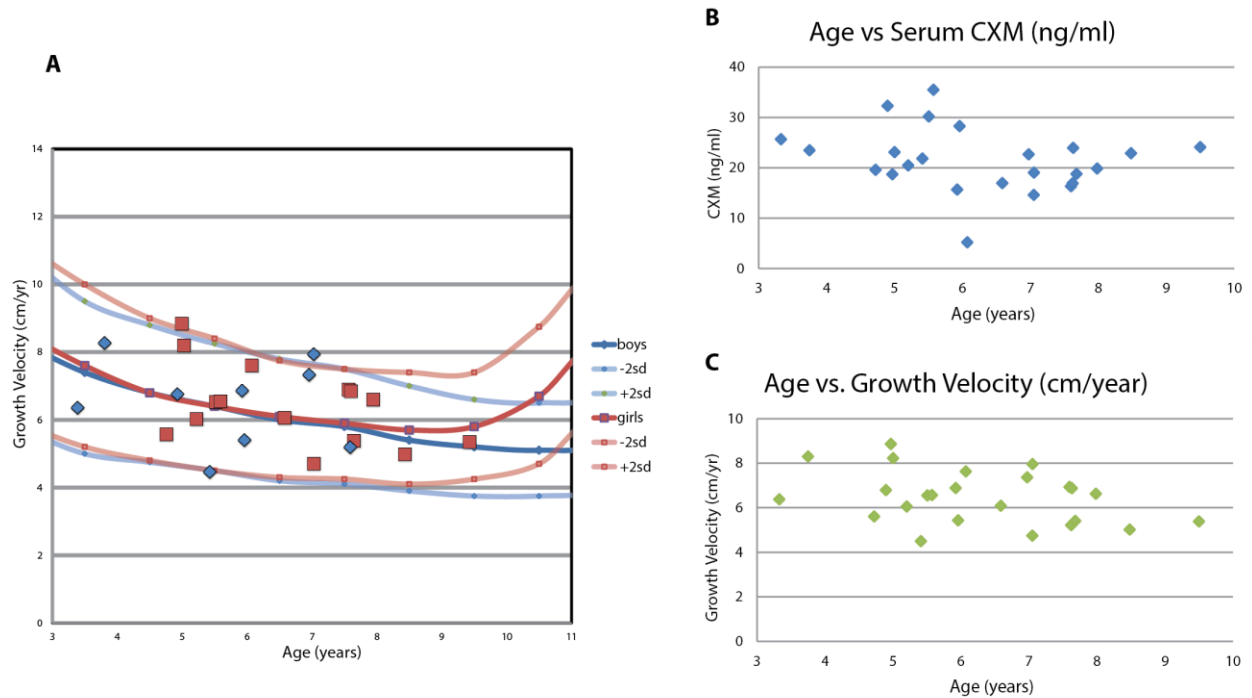

**Fig. S5. Relationship of stadiometer-based height velocities to CXM.** 23 subjects between ages 3.3 and 9.5 years whose data was used in the CXM vs observed height velocity analysis. A. Essentially all of our subjects fell within the normal  $\pm 2SD$  range when their measured growth velocities were plotted against established norms for age (9). B and C. Comparison of CXM values and observed height velocity to age, respectively. Both show a slight decline with age as expected. A visual inspection of the two plots suggests a greater dispersion for the CXM values (A) compared to observed height velocity (B).



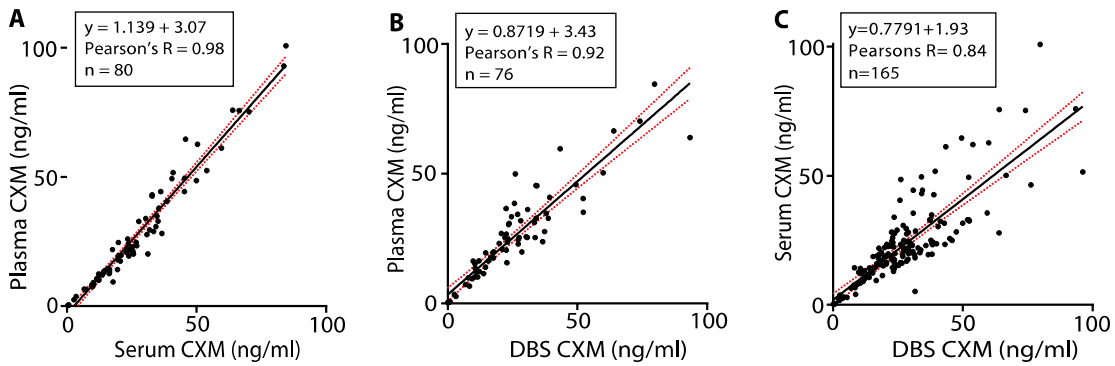

**Fig. S6. Relationship between serum, plasma, and DBS concentrations.** Serum, plasma, and DBS concentrations from paired samples are compared. The best-fit linear regression line is shown for each comparison in black, with 95% CI shown in red.

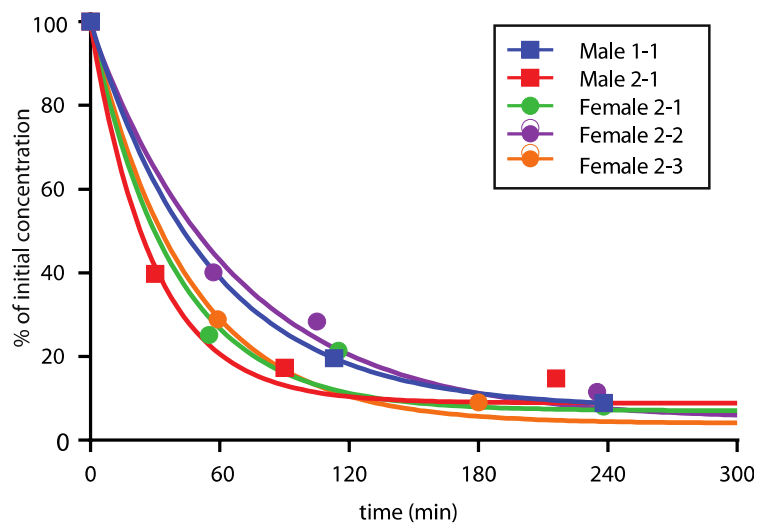

**Fig. S7. Half-life of Cxm.** Half-life of rNC1 was determined by injecting mouse rNC1 into 5 adult mice. Time zero corresponds to the initial blood sample 10 minute after injection. Best fit curves for each mouse were created in Prism using non-linear fit of one-phase decay.

**Table S1. Technical characterization of CXM assay.**

| Technical Validation Step           | Matrix / Analyte tested |               |               |                                               |
|-------------------------------------|-------------------------|---------------|---------------|-----------------------------------------------|
|                                     | rNC1                    | Serum         | Plasma        | DBS                                           |
| Detection range                     | 5.4-800 pg/ml           | 5.4-800 pg/ml | 5.4-800 pg/ml | 5.4-800 pg/ml                                 |
| Lower limit of quantitation         | 5.4 pg/ml               | N/A           | N/A           | N/A                                           |
| Intra-assay variation (CV%)         | 4%                      | 3%            | 3%            | 4%                                            |
| Inter-assay variation (CV%)         | 8%                      | 5%            | 3%            | 11%                                           |
| Suggested dilution (children)       | N/A                     | 1:200         | 1:200         | 1x3.1mm punch in 300ul SD<br>(1:178 dilution) |
| Suggested dilution (adults)         | N/A                     | 1:20          | 1:20          | 2x3.1mm punch in 240ul SD<br>(1:72 dilution)  |
| Matched samples as % of serum value | N/A                     | N/A           | 107%          | 125%                                          |
| Analyte stability (4C/-20C)         | 99% (18 h)              | 96% (18 h)    | 101% (18 h)   | 97% (8 days)                                  |
| Analyte stability (20C/-20C)        | 96% (18 h)              | 92% (18 h)    | 104% (18 h)   | 91% (8 days)                                  |
| Analyte stability (37C/-20C)        | 101% (18 h)             | 102% (18 h)   | 97% (18 h)    | 75% (8 days)                                  |
| Analyte stability (50C/-20C)        | 102% (18 h)             | 87% (18 h)    | 81% (18 h)    | 11% (8 days)                                  |

Abbreviations: h-hours. C: Degrees Celsius

**Table S2. Diurnal variation data.**

**Multi-week diurnal samples**

| Sample ID | Sex | Age (years) | Week | Day | Hour  | CXM (ng/ml) |
|-----------|-----|-------------|------|-----|-------|-------------|
| 107       | F   | 2           | 1    | 1   | 9.75  | 39.81       |
| 107       | F   | 2           | 1    | 1   | 17.33 | 35.63       |
| 107       | F   | 2           | 1    | 1   | 19.25 | 34.63       |
| 107       | F   | 2           | 1    | 2   | 9.95  | 46.83       |
| 107       | F   | 2           | 1    | 2   | 16.25 | 34.62       |
| 107       | F   | 2           | 1    | 2   | 19.25 | 33.24       |
| 107       | F   | 2           | 1    | 2   | 21.87 | 35.60       |
| 107       | F   | 2           | 1    | 3   | 10.17 | 44.13       |
| 107       | F   | 2           | 1    | 3   | 18.65 | 33.09       |
| 107       | F   | 2           | 1    | 3   | 20.53 | 22.32       |
| 107       | F   | 2           | 1    | 3   | 22.75 | 31.98       |
| 107       | F   | 2           | 2    | 1   | 9.83  | 39.92       |
| 107       | F   | 2           | 2    | 1   | 17.00 | 28.89       |
| 107       | F   | 2           | 2    | 1   | 20.50 | 33.89       |
| 107       | F   | 2           | 2    | 2   | 9.87  | 45.93       |
| 107       | F   | 2           | 2    | 2   | 13.83 | 41.53       |
| 107       | F   | 2           | 2    | 2   | 17.50 | 36.64       |
| 107       | F   | 2           | 3    | 1   | 9.67  | 41.21       |
| 107       | F   | 2           | 3    | 1   | 14.25 | 27.51       |
| 107       | F   | 2           | 3    | 1   | 20.42 | 16.18       |
| 107       | F   | 2           | 3    | 2   | 9.42  | 35.16       |
| 107       | F   | 2           | 3    | 2   | 13.42 | 29.09       |
| 107       | F   | 2           | 3    | 2   | 20.50 | 23.30       |
| 107       | F   | 2           | 3    | 3   | 13.83 | 25.62       |
| 107       | F   | 2           | 3    | 3   | 17.67 | 20.96       |
| 107       | F   | 2           | 3    | 3   | 19.92 | 25.33       |
| 108       | F   | 4           | 1    | 1   | 10.75 | 23.61       |
| 108       | F   | 4           | 1    | 1   | 15.50 | 25.46       |
| 108       | F   | 4           | 1    | 1   | 20.50 | 18.07       |
| 108       | F   | 4           | 1    | 2   | 9.50  | 24.82       |
| 108       | F   | 4           | 1    | 2   | 13.00 | 22.30       |
| 108       | F   | 4           | 1    | 2   | 19.00 | 22.09       |
| 108       | F   | 4           | 1    | 3   | 9.00  | 24.78       |
| 108       | F   | 4           | 1    | 3   | 12.75 | 23.29       |
| 108       | F   | 4           | 1    | 3   | 20.75 | 22.04       |
| 108       | F   | 4           | 2    | 1   | 11.00 | 25.43       |
| 108       | F   | 4           | 2    | 1   | 17.00 | 24.17       |
| 108       | F   | 4           | 2    | 1   | 19.75 | 24.10       |
| 108       | F   | 4           | 2    | 2   | 11.00 | 37.00       |
| 108       | F   | 4           | 2    | 2   | 14.17 | 28.21       |
| 108       | F   | 4           | 2    | 2   | 19.75 | 22.38       |
| 108       | F   | 4           | 2    | 3   | 11.00 | 31.85       |
| 108       | F   | 4           | 2    | 3   | 14.00 | 28.62       |
| 108       | F   | 4           | 2    | 3   | 18.00 | 24.86       |
| 108       | F   | 4           | 3    | 1   | 9.00  | 23.56       |
| 108       | F   | 4           | 3    | 1   | 14.00 | 14.28       |
| 108       | F   | 4           | 3    | 1   | 22.00 | 16.66       |
| 108       | F   | 4           | 3    | 2   | 10.50 | 28.44       |
| 108       | F   | 4           | 3    | 2   | 13.50 | 21.67       |
| 108       | F   | 4           | 3    | 2   | 20.75 | 20.08       |
| 108       | F   | 4           | 3    | 3   | 11.00 | 24.64       |
| 108       | F   | 4           | 3    | 3   | 15.00 | 18.61       |
| 108       | F   | 4           | 3    | 3   | 21.83 | 18.44       |
| 116       | F   | 11          | 1    | 1   | 9.58  | 31.78       |
| 116       | F   | 11          | 1    | 1   | 17.08 | 36.29       |
| 116       | F   | 11          | 1    | 1   | 23.33 | 45.12       |
| 116       | F   | 11          | 1    | 2   | 9.67  | 56.89       |
| 116       | F   | 11          | 1    | 2   | 19.25 | 34.23       |
| 116       | F   | 11          | 1    | 2   | 21.60 | 40.24       |
| 116       | F   | 11          | 1    | 3   | 8.65  | 42.20       |
| 116       | F   | 11          | 1    | 3   | 16.83 | 45.95       |
| 116       | F   | 11          | 1    | 3   | 22.67 | 44.88       |
| 116       | F   | 11          | 2    | 1   | 13.00 | 41.52       |
| 116       | F   | 11          | 2    | 1   | 21.05 | 27.96       |
| 116       | F   | 11          | 2    | 1   | 23.75 | 22.97       |
| 116       | F   | 11          | 2    | 2   | 9.85  | 33.42       |
| 116       | F   | 11          | 2    | 2   | 13.20 | 42.71       |
| 116       | F   | 11          | 2    | 2   | 19.25 | 31.09       |
| 116       | F   | 11          | 2    | 2   | 20.98 | 28.79       |
| 116       | F   | 11          | 2    | 3   | 7.50  | 23.14       |
| 116       | F   | 11          | 2    | 3   | 18.77 | 32.59       |
| 116       | F   | 11          | 2    | 3   | 22.83 | 26.01       |
| 116       | F   | 11          | 3    | 1   | 8.52  | 36.14       |
| 116       | F   | 11          | 3    | 1   | 19.12 | 29.63       |
| 116       | F   | 11          | 3    | 1   | 22.27 | 28.54       |
| 116       | F   | 11          | 3    | 2   | 8.38  | 36.83       |
| 116       | F   | 11          | 3    | 3   | 8.82  | 23.42       |
| 116       | F   | 11          | 3    | 3   | 19.35 | 33.34       |
| 116       | F   | 11          | 3    | 3   | 21.85 | 27.98       |
| 116       | F   | 11          | 3    | 4   | 11.68 | 37.59       |
| 116       | F   | 11          | 3    | 4   | 22.25 | 26.77       |

**Single week diurnal samples**

| Sample ID | Sex | Age (years) | Day | Hour  | CXM (ng/ml) |
|-----------|-----|-------------|-----|-------|-------------|
| 101       | M   | 4           | 1   | 13.75 | 20.42       |
| 101       | M   | 4           | 2   | 13.83 | 25.30       |
| 101       | M   | 4           | 2   | 17.83 | 22.49       |
| 101       | M   | 4           | 2   | 20.25 | 20.86       |
| 101       | M   | 4           | 3   | 6.93  | 34.78       |
| 101       | M   | 4           | 3   | 10.48 | 25.68       |
| 101       | M   | 4           | 4   | 17.25 | 20.46       |
| 101       | M   | 4           | 4   | 20.25 | 19.40       |
| 101       | M   | 4           | 5   | 7.25  | 26.81       |
| 103       | F   | 11          | 1   | 10.00 | 20.68       |
| 103       | F   | 11          | 1   | 18.87 | 16.80       |
| 103       | F   | 11          | 1   | 22.62 | 12.93       |
| 103       | F   | 11          | 2   | 10.03 | 25.13       |
| 103       | F   | 11          | 2   | 21.60 | 18.66       |
| 103       | F   | 11          | 2   | 22.50 | 16.90       |
| 103       | F   | 11          | 3   | 10.02 | 20.51       |
| 103       | F   | 11          | 3   | 15.22 | 18.10       |
| 103       | F   | 11          | 3   | 22.00 | 19.06       |
| 105       | M   | 7           | 1   | 10.08 | 22.81       |
| 105       | M   | 7           | 1   | 19.50 | 12.99       |
| 105       | M   | 7           | 1   | 23.00 | 17.64       |
| 105       | M   | 7           | 2   | 10.00 | 10.04       |
| 105       | M   | 7           | 2   | 18.00 | 11.89       |
| 105       | M   | 7           | 3   | 10.00 | 14.50       |
| 105       | M   | 7           | 3   | 18.50 | 15.77       |
| 105       | M   | 7           | 3   | 23.00 | 16.63       |
| 113       | M   | 14          | 1   | 10.77 | 30.93       |
| 113       | M   | 14          | 1   | 19.67 | 24.57       |
| 113       | M   | 14          | 2   | 11.00 | 29.43       |
| 113       | M   | 14          | 2   | 11.00 | 28.28       |
| 113       | M   | 14          | 2   | 19.00 | 28.89       |
| 113       | M   | 14          | 3   | 11.00 | 31.18       |
| 113       | M   | 14          | 3   | 13.00 | 26.42       |
| 113       | M   | 14          | 4   | 10.50 | 38.95       |
| 113       | M   | 14          | 4   | 18.50 | 29.73       |
| 113       | M   | 14          | 4   | 22.50 | 31.23       |
| 117       | F   | 7           | 1   | 8.00  | 17.53       |
| 117       | F   | 7           | 1   | 18.50 | 15.54       |
| 117       | F   | 7           | 1   | 20.50 | 14.57       |
| 117       | F   | 7           | 2   | 9.25  | 15.87       |
| 117       | F   | 7           | 2   | 17.50 | 15.81       |
| 117       | F   | 7           | 2   | 20.50 | 11.29       |
| 117       | F   | 7           | 3   | 6.00  | 13.70       |
| 117       | F   | 7           | 3   | 18.50 | 12.25       |
| 117       | F   | 7           | 3   | 21.00 | 10.65       |
| 115       | F   | 5           | 1   | 8.32  | 11.81       |
| 115       | F   | 5           | 1   | 17.42 | 10.17       |
| 115       | F   | 5           | 1   | 21.63 | 9.28        |
| 115       | F   | 5           | 2   | 7.58  | 17.47       |
| 115       | F   | 5           | 2   | 17.72 | 9.64        |
| 115       | F   | 5           | 2   | 21.80 | 7.66        |
| 115       | F   | 5           | 3   | 17.38 | 16.14       |
| 115       | F   | 5           | 3   | 22.23 | 9.18        |
| 118       | F   | 13          | 1   | 6.83  | 18.53       |
| 118       | F   | 13          | 1   | 17.75 | 12.34       |
| 118       | F   | 13          | 1   | 21.82 | 11.70       |
| 118       | F   | 13          | 2   | 8.88  | 14.82       |
| 118       | F   | 13          | 2   | 20.60 | 12.90       |
| 118       | F   | 13          | 2   | 22.62 | 12.85       |
| 118       | F   | 13          | 3   | 7.93  | 18.36       |
| 118       | F   | 13          | 3   | 21.25 | 13.00       |
| 106       | M   | 10          | 1   | 8.80  | 14.48       |
| 106       | M   | 10          | 1   | 18.40 | 13.36       |
| 106       | M   | 10          | 1   | 21.00 | 12.06       |
| 106       | M   | 10          | 2   | 9.42  | 15.32       |
| 106       | M   | 10          | 2   | 18.08 | 11.87       |
| 106       | M   | 10          | 2   | 20.58 | 9.10        |
| 106       | M   | 10          | 3   | 7.17  | 13.92       |
| 106       | M   | 10          | 3   | 18.50 | 10.83       |
| 106       | M   | 10          | 3   | 20.50 | 10.31       |
| 119       | M   | 11          | 1   | 7.78  | 30.30       |
| 119       | M   | 11          | 1   | 19.93 | 21.16       |
| 119       | M   | 11          | 1   | 20.73 | 15.90       |
| 119       | M   | 11          | 2   | 8.40  | 28.26       |
| 119       | M   | 11          | 2   | 18.52 | 17.30       |
| 119       | M   | 11          | 2   | 19.77 | 18.71       |
| 119       | M   | 11          | 3   | 10.02 | 26.07       |
| 119       | M   | 11          | 3   | 17.33 | 15.67       |
| 119       | M   | 11          | 3   | 21.07 | 15.22       |

**Analysis of all Diurnal samples grouped by Sample ID**

| Sample ID        | Sex | Age (years) | Average CXM before 2pm (ng/ml) | n (before 2pm samples) | Average CXM after 2pm (ng/ml) | n (after 2pm samples) | Average morning CXM/ Average afternoon CXM percentage |
|------------------|-----|-------------|--------------------------------|------------------------|-------------------------------|-----------------------|-------------------------------------------------------|
| 107              | F   | 2           | 38.92                          | 10                     | 29.61                         | 16                    | 131.43%                                               |
| 108              | F   | 4           | 25.31                          | 14                     | 21.94                         | 13                    | 115.37%                                               |
| 116              | F   | 11          | 36.88                          | 11                     | 33.08                         | 17                    | 111.47%                                               |
| 101              | M   | 4           | 26.60                          | 5                      | 20.80                         | 4                     | 127.85%                                               |
| 103              | F   | 11          | 22.11                          | 3                      | 17.07                         | 6                     | 129.47%                                               |
| 105              | M   | 7           | 15.78                          | 3                      | 14.98                         | 5                     | 105.33%                                               |
| 113              | M   | 14          | 30.86                          | 6                      | 28.61                         | 4                     | 107.89%                                               |
| 117              | F   | 7           | 15.70                          | 3                      | 13.35                         | 6                     | 117.60%                                               |
| 115              | F   | 5           | 14.64                          | 2                      | 10.35                         | 6                     | 141.49%                                               |
| 118              | F   | 13          | 17.24                          | 3                      | 12.56                         | 5                     | 137.26%                                               |
| 106              | M   | 10          | 14.57                          | 3                      | 11.25                         | 6                     | 129.49%                                               |
| 119              | M   | 11          | 28.21                          | 3                      | 17.33                         | 6                     | 162.81%                                               |
| Overall average: |     |             |                                |                        |                               |                       | 126.45%                                               |

**Table S3. Blood sample data.**

| ID no   | Age at draw (years) | Sex | Height (cm) | Growth Velocity (cm/year) | Serum CXM (ng/ml) | Serum CVM CV% | Plasma CXM (ng/ml) | Plasma CVM CV% | DBS CXM (ng/ml) | DBS CVM CV% |
|---------|---------------------|-----|-------------|---------------------------|-------------------|---------------|--------------------|----------------|-----------------|-------------|
| NO65    | 0.06                | M   | 56.5        |                           | 92.86             | 4%            | 83.73              | 3%             |                 |             |
| NO66    | 0.17                | M   | 61.0        |                           | 52.46             | 6%            | 53.96              | 6%             |                 |             |
| NO67    | 0.67                | F   | 69.4        |                           | 75.24             | 7%            | 70.28              | 3%             | 74.10           | 5%          |
| NO68    | 9.08                | M   | 131.0       |                           | 20.65             | 0%            | 25.49              | 2%             | 30.73           | 4%          |
| NO69    | 8.92                | M   | 136.9       |                           | 19.43             | 2%            | 23.85              | 1%             | 36.63           | 1%          |
| NO70    | 0.67                | M   | 69.0        |                           | 37.92             | 5%            | 35.44              | 3%             |                 |             |
| NO71    | 5.50                | M   | 114.9       |                           | 17.47             | 0%            | 20.58              | 2%             | 22.61           | 8%          |
| NO72    | 0.67                | M   | 77.0        |                           | 64.57             | 1%            | 45.81              | 1%             | 49.51           | 1%          |
| NO73    | 0.92                | F   | 77.0        |                           | 62.69             | 6%            | 50.40              | 3%             | 59.98           | 1%          |
| NO74    | 0.75                | F   | 73.0        |                           | 42.60             | 2%            | 32.89              | 5%             | 38.81           | 3%          |
| NO75    | 12.00               | M   | 155.7       |                           | 20.20             | 4%            | 31.20              | 1%             | 33.45           | 3%          |
| NO76    | 4.42                | F   | 107.2       |                           | 32.87             | 3%            | 35.16              | 3%             | 52.29           | 3%          |
| NO77    | 1.58                | M   | 84.2        |                           | 75.65             | 5%            | 66.51              | 1%             | 64.01           | 1%          |
| NO78    | 0.17                | F   | 55.0        |                           | 75.81             | 7%            | 63.95              | 3%             | 93.41           | 6%          |
| NO79    | 1.58                | M   | 82.0        |                           | 32.81             | 4%            | 27.70              | 0%             | 37.39           | 6%          |
| NO80    | 12.33               | F   | 162.9       |                           | 18.79             | 2%            |                    | 2%             | 26.86           | 4%          |
| NO81    | 13.42               | M   | 152.2       |                           | 23.01             | 2%            | 25.36              | 2%             | 22.06           | 9%          |
| NO82    | 0.67                | F   | 71.0        |                           | 49.35             | 1%            | 40.46              | 1%             | 52.20           | 5%          |
| NO83    | 2.83                | F   | 95.7        |                           | 44.32             | 1%            | 36.20              | 3%             | 30.83           | 18%         |
| NO84    | 4.67                | M   | 102.9       |                           | 24.62             | 2%            | 19.84              | 1%             | 28.60           | 3%          |
| NO85    | 13.75               | F   | 159.9       |                           | 14.10             | 3%            | 15.26              | 2%             | 10.48           | 8%          |
| NO86    | 0.13                | M   | 55.0        |                           | 100.78            | 5%            | 84.51              | 2%             | 79.76           | 3%          |
| NO87    | 12.33               | F   | 152.4       |                           | 21.26             | 1%            | 25.40              | 2%             | 33.77           | 7%          |
| NO88    | 7.58                | M   | 131.1       |                           | 19.68             | 1%            | 20.86              | 2%             | 21.16           | 4%          |
| NO89    | 7.42                | M   | 132.4       |                           | 12.87             | 2%            | 13.97              | 3%             | 14.59           | 2%          |
| NO90    | 9.00                | M   | 132.4       |                           | 12.12             | 2%            | 13.64              | 3%             | 10.62           | 1%          |
| NO91    | 7.00                | M   | 121.0       |                           | 13.22             | 5%            | 16.42              | 7%             | 12.05           | 4%          |
| NO92    | 3.17                | F   | 93.9        |                           | 51.69             | 1%            | 40.93              | 4%             | 39.33           | 7%          |
| NO93    | 1.83                | M   | 80.5        |                           | 24.14             | 1%            | 23.66              | 4%             | 23.03           | 1%          |
| NO94    | 1.25                | F   | 70.0        |                           | 43.07             | 4%            | 32.83              | 9%             | 34.08           | 1%          |
| NO95    | 0.75                | M   | 73.5        |                           | 61.19             | 5%            | 59.63              | 1%             | 43.40           | 7%          |
| NO96    | 5.50                | M   | 104.7       |                           | 14.16             | 2%            | 19.50              | 5%             | 14.68           | 4%          |
| NO97    | 13.33               | F   | 159.8       |                           | 14.28             | 2%            | 16.42              | 1%             | 15.69           | 3%          |
| NO98    | 5.50                | M   | 112.3       |                           | 9.41              | 3%            | 17.75              | 1%             | 16.56           | 0%          |
| NO99    | 6.33                | M   | 110.8       |                           | 14.43             | 2%            | 15.67              | 1%             | 22.86           | 5%          |
| N100    | 14.08               | F   | 164.6       |                           | 3.79              | 0%            | 3.52               | 2%             | 2.57            | 5%          |
| N101    | 12.83               | M   | 167.1       |                           | 10.65             | 6%            | 11.55              | 3%             | 13.84           | 6%          |
| N102    | 15.58               | M   | 176.5       |                           | 6.00              | 5%            | 6.66               | 0%             | 8.44            | 1%          |
| N103    | 11.33               | M   | 148.0       |                           | 21.64             | 5%            | 24.59              | 2%             | 27.24           | 1%          |
| N104    | 12.00               | F   | 160.8       |                           | 10.07             | 1%            | 12.26              | 0%             | 12.22           | 1%          |
| N105    | 12.00               | F   | 156.0       |                           | 12.60             | 2%            | 16.26              | 7%             | 9.83            | 4%          |
| N106    | 8.33                | F   | 127.2       |                           | 28.16             | 1%            | 36.61              | 2%             | 22.53           | 2%          |
| N107    | 0.50                | M   | 67.0        |                           | 62.04             | 2%            |                    | 5%             | 53.89           | 3%          |
| SG2001  | 28.50               | F   | 166.5       |                           | 0.37              | 5%            | 0.44               | 2%             | 0.48            | 10%         |
| SG2002  | 23.08               | F   | 166.1       |                           | 0.24              | 9%            | 0.30               | 5%             | 0.00            |             |
| SG2003  | 29.83               | M   | 177.6       |                           | 0.11              | 17%           | 0.16               | 9%             | 0.00            |             |
| SG2004  | 26.67               | F   | 165.2       |                           | 0.44              | 0%            | 0.51               | 3%             | 0.58            | 7%          |
| SG2005  | 29.00               | F   | 147.0       |                           | 0.29              | 8%            | 0.45               | 2%             | 0.23            | 9%          |
| SG2006  | 28.00               | M   | 196.6       |                           | 0.20              | 0%            | 0.28               | 2%             | 0.00            |             |
| SG2007  | 28.42               | M   | 186.4       |                           | 0.31              | 1%            | 0.24               | 8%             | 0.13            | 8%          |
| SG2008  | 31.00               | M   | 174.7       |                           | 0.32              | 3%            | 0.29               | 5%             | 0.70            |             |
| SG2009  | 27.33               | F   | 173.3       |                           | 0.34              | 7%            | 0.25               | 3%             | 0.32            | 5%          |
| SG2010  | 20.08               | F   | 168.3       |                           | 0.51              | 1%            | 0.69               | 6%             | 0.92            | 8%          |
| NG1001c | 1.31                | F   | 78.5        | 11.080                    | 20.91             | 4%            |                    |                | 28.45           | 1%          |
| NG1002a | 4.91                | M   | 106.0       |                           | 29.43             | 12%           |                    |                |                 |             |
| NG1002b | 5.45                | M   |             |                           | 19.62             | 3%            |                    |                | 38.09           | 0%          |
| NG1002c | 5.96                | M   | 111.7       | 5.432                     | 28.25             | 2%            |                    |                | 47.48           | 3%          |
| NG1003a | 4.50                | F   | 110.0       |                           | 25.11             | 5%            |                    |                |                 |             |
| NG1003b | 5.00                | F   | 114.1       | 8.223                     | 23.08             | 1%            |                    |                | 30.53           | 3%          |
| NG1003c | 5.51                | F   | 117.4       | 6.546                     | 30.14             | 4%            |                    |                |                 |             |
| NG1004  | 3.70                | M   | 102.0       |                           | 16.17             | 2%            |                    |                | 26.55           | 2%          |
| NG1005a | 2.08                | F   | 83.0        |                           | 28.31             | 0%            |                    |                |                 |             |
| NG1005b | 2.65                | F   | 85.6        | 4.562                     | 27.49             | 2%            |                    |                | 28.34           | 6%          |
| NG1006a | 0.25                | M   | 61.1        |                           | 27.89             | 1%            |                    |                | 63.96           | 2%          |
| NG1006b | 0.70                | M   | 70.7        | 21.764                    | 24.13             | 5%            |                    |                | 38.62           | 7%          |
| NG1007a | 0.90                | F   | 74.6        |                           | 46.47             | 9%            |                    |                | 76.22           | 10%         |
| NG1007b | 1.46                | F   | 82.5        | 14.066                    | 35.59             | 5%            |                    |                | 59.35           | 2%          |
| NG1007c | 2.03                | F   | 88.2        | 10.002                    | 21.99             | 2%            |                    |                | 32.69           | 5%          |
| NG1008  | 0.45                | M   | 65.3        |                           | 32.48             | 0%            |                    |                | 52.44           | 5%          |
| NG1009  | 0.92                | F   | 73.5        |                           | 24.94             | 2%            |                    |                | 45.82           | 3%          |
| NG1009c | 2.57                | F   | 90.0        | 10.004                    | 18.91             | 8%            |                    |                | 21.91           | 7%          |
| NG1010a | 2.98                | M   | 99.1        |                           | 23.67             | 5%            |                    |                | 39.83           | 9%          |
| NG1010b | 3.33                | M   | 101.3       | 6.373                     | 25.66             | 4%            |                    |                | 44.94           | 1%          |
| NG1010c | 3.75                | M   | 104.8       | 8.295                     | 23.44             | 8%            |                    |                | 43.06           | 18%         |
| NG1011a | 4.47                | M   | 101.0       |                           | 23.27             | 6%            |                    |                | 38.27           | 1%          |
| NG1011b | 4.90                | M   | 103.9       | 6.785                     | 32.27             | 8%            |                    |                | 41.30           | 2%          |
| NG1011c | 5.41                | M   | 106.2       | 4.489                     | 21.80             | 2%            |                    |                | 27.72           | 2%          |
| NG1012a | 0.18                | F   | 50.0        |                           | 51.47             | 2%            |                    |                | 96.14           | 0%          |
| NG1012b | 0.53                | F   | 62.0        | 34.762                    | 50.09             | 3%            |                    |                | 66.65           | 2%          |
| NG1013a | 4.21                | F   | 102.2       |                           | 17.67             | 0%            |                    |                | 28.83           | 3%          |
| NG1013b | 4.72                | F   | 105.1       | 5.601                     | 19.57             | 1%            |                    |                | 26.66           | 2%          |
| NG1013c | 5.20                | F   | 108.0       | 6.049                     | 20.43             | 1%            |                    |                | 18.59           | 2%          |
| NG1014a | 1.34                | M   | 77.5        |                           | 23.80             | 7%            |                    |                | 29.92           | 7%          |
| NG1014b | 1.66                | M   | 82.7        | 16.222                    | 22.40             | 3%            |                    |                | 29.14           | 6%          |
| NG1014c | 2.33                | M   | 89.4        | 9.982                     | 24.96             | 3%            |                    |                | 27.20           | 7%          |
| NG1015  | 0.55                | F   | 70.0        |                           | 31.59             | 1%            |                    |                | 49.95           | 1%          |
| NG1016a | 0.97                | F   | 73.0        |                           | 25.03             | 4%            |                    |                | 37.65           | 12%         |
| NG1016b | 1.32                | F   | 77.9        | 14.194                    | 32.98             | 9%            |                    |                | 37.23           | 2%          |
| NG1016c | 2.29                | F   | 87.0        | 9.304                     | 31.58             | 6%            |                    |                | 42.86           | 0%          |
| NG1017a | 3.66                | F   | 99.5        |                           | 28.59             | 1%            |                    |                | 31.76           | 12%         |
| NG1017b | 4.97                | F   | 111.1       |                           | 8.858             |               |                    |                | 18.70           | 3%          |
| NG2001a | 7.21                | F   | 127.3       |                           |                   |               |                    |                | 26.20           | 5%          |
| NG2001b | 7.63                | F   | 130.2       | 6.873                     |                   |               |                    |                | 23.92           | 2%          |
| NG2002  | 15.39               | M   | 154.9       |                           |                   |               |                    |                | 32.04           | 4%          |
| NG2003  | 5.59                | F   | 107.9       |                           |                   |               |                    |                | 25.52           | 1%          |
| NG2004a | 5.48                | M   | 111.1       |                           |                   |               |                    |                | 11.95           | 4%          |
| NG2004b | 5.92                | M   | 123.8       | 6.878                     |                   |               |                    |                | 15.66           | 0%          |
| NG2004c | 7.05                | M   | 132.8       | 7.954                     |                   |               |                    |                | 19.02           | 1%          |
| NG2005  | 8.75                | M   | 117.0       |                           |                   |               |                    |                | 14.85           | 1%          |
| NG2006  | 5.25                | M   | 114.0       |                           |                   |               |                    |                | 25.99           | 4%          |
| NG2006b | 6.98                | M   | 126.7       | 7.358                     |                   |               |                    |                | 22.63           | 1%          |
| NG2007a | 8.89                | F   | 137.5       |                           |                   |               |                    |                | 25.07           | 2%          |
| NG2007b | 9.50                | F   | 140.8       | 5.377                     |                   |               |                    |                | 24.06           | 5%          |
| NG2007c | 10.02               | F   | 143.5       | 5.214                     |                   |               |                    |                | 17.76           | 3%          |
| NG2008a | 6.66                | F   | 113.9       |                           |                   |               |                    |                | 24.35           | 5%          |
| NG2008b | 7.99                | F   | 122.7       | 6.623                     |                   |               |                    |                | 19.84           | 1%          |
| NG2008c | 8.48                | F   | 125.2       | 5.014                     |                   |               |                    |                | 22.87           | 0%          |
| NG2009a | 9.95                | F   | 156.7       |                           |                   |               |                    |                | 32.25           | 5%          |
| NG2009b | 10.42               | F   | 161.4       | 9.803                     |                   |               |                    |                | 32.93           | 2%          |
| NG2009c | 15.03               | F   | 165.7       | 9.072                     |                   |               |                    |                | 30.31           | 2%          |
| NG2010a | 15.03               | F   | 154.0       |                           |                   |               |                    |                | 3.07            | 3%          |
| NG2010b | 15.49               | F   | 154.2       | 0.435                     |                   |               |                    |                | 2.18            | 7%          |
| NG2010c | 16.41               | F   | 154.3       | 0.192                     |                   |               |                    |                | 1.73            | 1%          |
| NG2011  | 8.81                | F   | 134.5       |                           |                   |               |                    |                | 19.36           | 1%          |
| NG2012a | 8.09                | F   | 117.3       |                           |                   |               |                    |                | 11.34           | 3%          |
| NG2012b | 7.62                | M   | 120.1       | 5.214                     |                   |               |                    |                | 16.91           | 0%          |
| NG2012c | 8.12                | M   |             |                           |                   |               |                    |                | 14.27           | 4%          |
| NG2013a | 13.10               | M   | 156.9       |                           |                   |               |                    |                | 15.59           | 0%          |
| NG2013b | 13.53               | M   | 158.6       | 3.978                     |                   |               |                    |                | 17.45           | 2%          |
| NG2014  | 11.23               | F   | 159.7       |                           |                   |               |                    |                | 22.03           | 1%          |
| NG2015  | 5.25                | M   | 111.8       |                           |                   |               |                    |                | 15.24           | 1%          |
| NG2016a | 5.90                | F   | 116.4       |                           |                   |               |                    |                | 15.83           | 1%          |
| NG2016b | 6.59                | F   | 120.6       | 6.083                     |                   |               |                    |                | 16.92           | 4%          |
| NG2016c | 7.60                | F   | 127.6       | 6.924                     |                   |               |                    |                | 16.32           | 4%          |
| NG2017a | 6.42                | F   | 116.1       |                           |                   |               |                    |                | 18.26           | 2%          |
| NG2017b | 7.05                | F   | 119.1       | 4.740                     |                   |               |                    |                | 14.59           | 3%          |
| NG2018a | 5.06                | F   | 109.4       |                           |                   |               |                    |                | 22.98           | 3%          |
| NG2018b | 5.58                | F   | 112.8       | 6.566                     |                   |               |                    |                | 35.48           | 1%          |
| NG2018c | 6.07                | F   | 116.6       | 7.621                     |                   |               |                    |                | 5.19            | 1%          |
| NG2019a | 12.61               | F   | 150.9       |                           |                   |               |                    |                | 4.06            | 0%          |
| NG2019b | 13.10               | F   | 151.0       | 0.201                     |                   |               |                    |                | 2.86            | 9%          |
| NG2019c | 13.74               | F   |             |                           |                   |               |                    |                | 2.60            | 5%          |
| NG2020  | 8.51                | M   | 138.1       |                           |                   |               |                    |                | 12.94           | 3%          |
| NG2021a | 9.62                | F   | 129.0       |                           |                   |               |                    |                | 16.41           | 1%          |
| NG2021b | 10.31               | F   | 132.3       | 4.780                     |                   |               |                    |                | 18.91           | 7%          |
| NG2021c | 11.02               | F   | 135.0       | 3.805                     |                   |               |                    |                | 15.11           | 2%          |
| NG2022a | 7.16                | F   | 116.0       |                           |                   |               |                    |                | 15.23           | 0%          |
| NG2022b | 7.68                | F   | 118.8       | 5.407                     |                   |               |                    |                | 18.78           | 0%          |
| NG2023  | 8.35                | F   | 130.7       |                           |                   |               |                    |                | 19.83           | 1%          |
| S1002a  | 0.17                | M   |             |                           | 49.52             | 0%            | 45.43              | 4%             | 34.06           | 5%          |
| S1002b  | 1.00                | M   |             |                           | 19.50             | 1%            | 19.88              | 6%             | 17.75           | 0%          |
| S1004a  | 1.83                | M   |             |                           | 33.91             | 1%            | 30.40              | 3%             | 23.51           | 1%          |
| S1004b  | 2.34                | M   |             |                           | 23.41             | 1%            | 26.94              | 1%             | 20.69           | 4%          |
| S1004c  | 3.02                | M   |             |                           | 21.90             | 3%            | 17.53              | 0%             | 17.60           | 2%          |
| S1005   | 5.17                | F   |             |                           | 30.80             | 3%</          |                    |                |                 |             |
